# Supplementary material for: A Bidirectional Non-Coding RNA Promoter Mediates Long-Range Gene Expression Regulation
Source: MDPI journal article supplement (doi:10.3390/genes15050549), 2024-04-25
Supplement: s1 [file s1]

Article

# A bidirectional non-coding RNA promoter mediates long-range gene expression regulation

Carlos Alberto Peralta-Alvarez<sup>1,2</sup>, Hober Nelson Nuñez-Martínez<sup>1</sup>, Ángel Josué Cerecedo-Castillo<sup>1</sup>, Augusto César Poot-Hernández<sup>2</sup>, Gustavo Tapia-Urzuá<sup>1</sup>, Sylvia Patricia Garza-Manero<sup>1</sup>, Georgina Guerrero<sup>1</sup>, Félix Recillas-Targa<sup>1</sup>

## Supplementary File 7: Supplementary Figures.

Figure S1

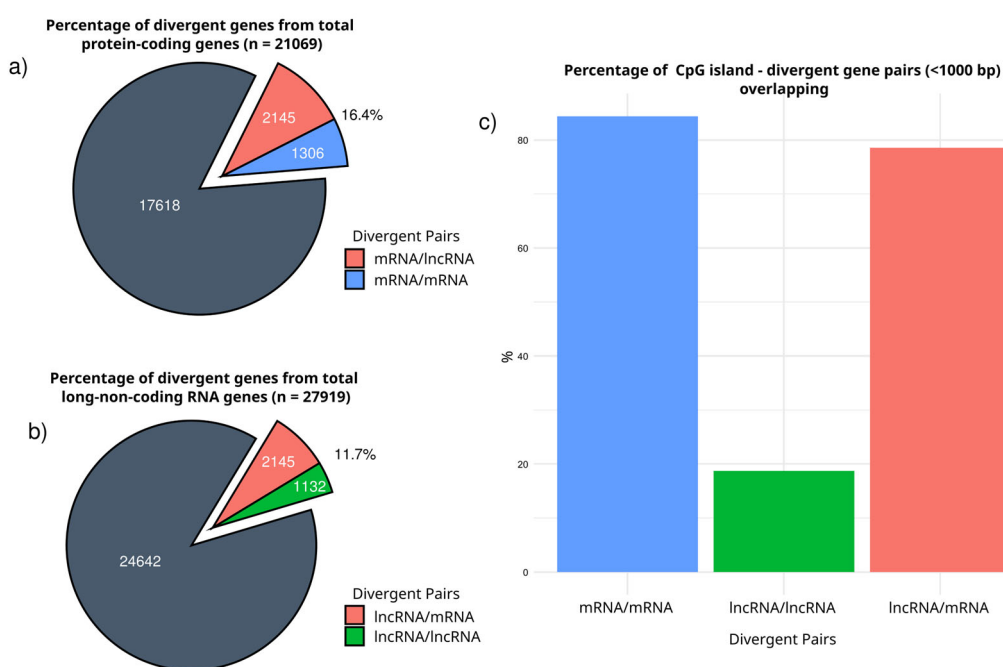

Hon 2017 long-non-coding RNA human genes. c) Intersection percentage of divergent genes up to 1000 bp with UCSC table browser hg19 CpG island data set.

**Figure 1S.** Divergent genes representation on human genome. a) Percentage of divergent protein-coding genes separated by 1000 bp or less relative to total Hon 2017 protein-coding human genes. b) Percentage of divergent long-non-coding RNA genes separated by 1000 bp or less relative to total

Figure S2

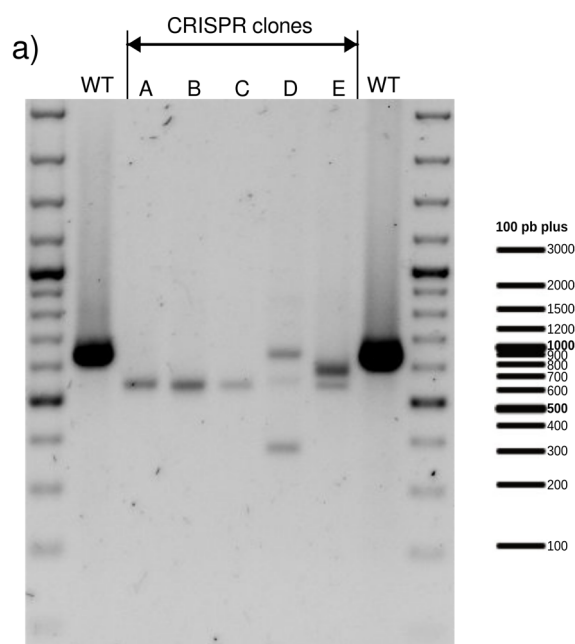

**Figure 2S.** CRISPR-Cas9 clones from BBQ elimination assay. **a)** PCR genotypification for CRISPR-Cas9 assay targeting BBQ element, lanes marked as A,B and C are apparent biallelic mutant clones, lane D appears to be a monoallelic BBQ elimination along a probable insertion event, and lane E appears to be a heterogeneous biallelic mutant with small deletions compared to the wild-type control. Mutant clones B1,B2, T1 or T2 are not present on this gel.

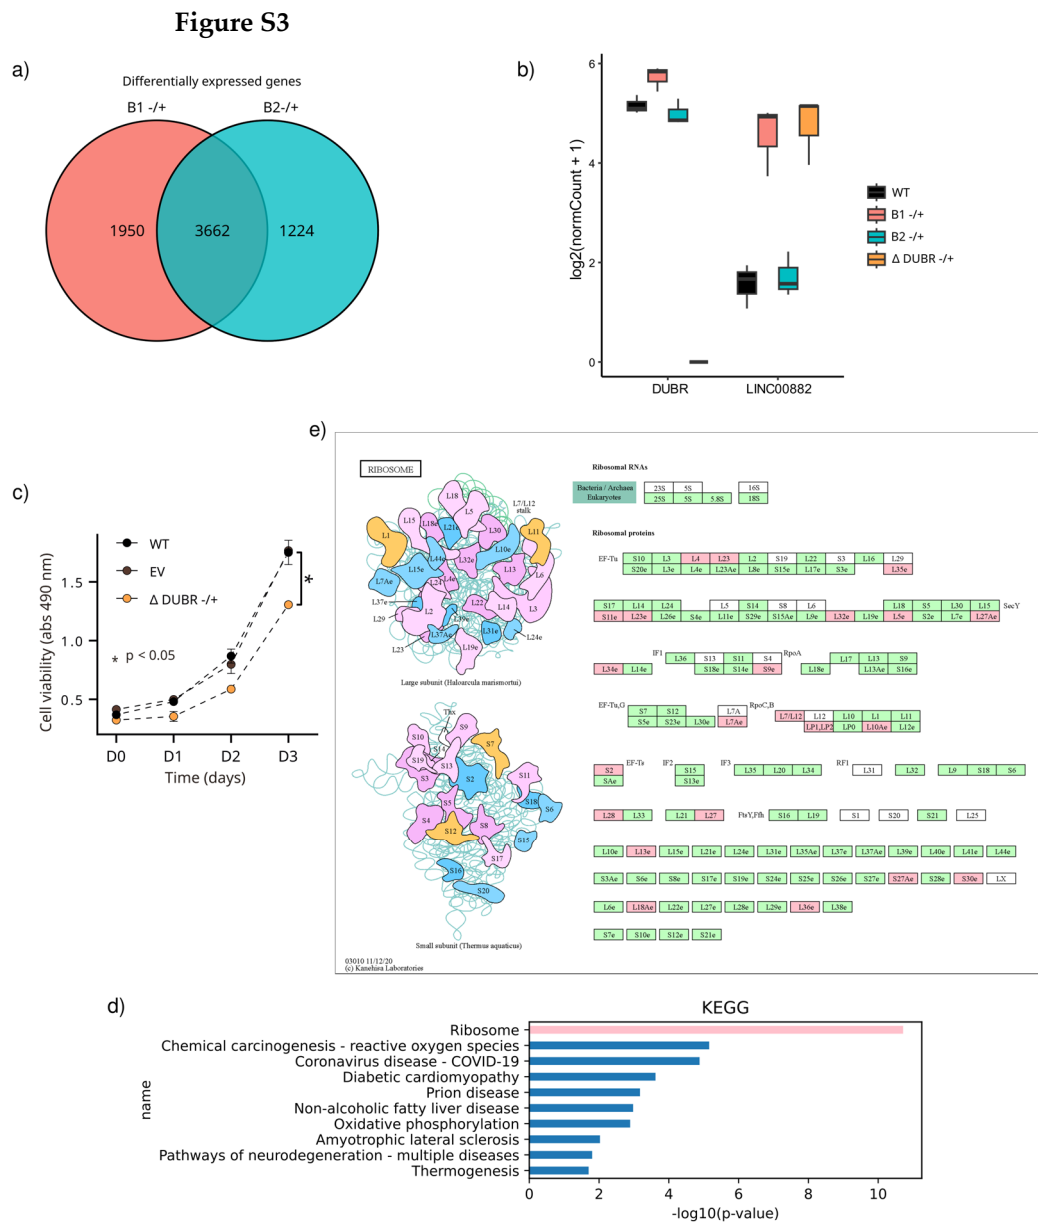

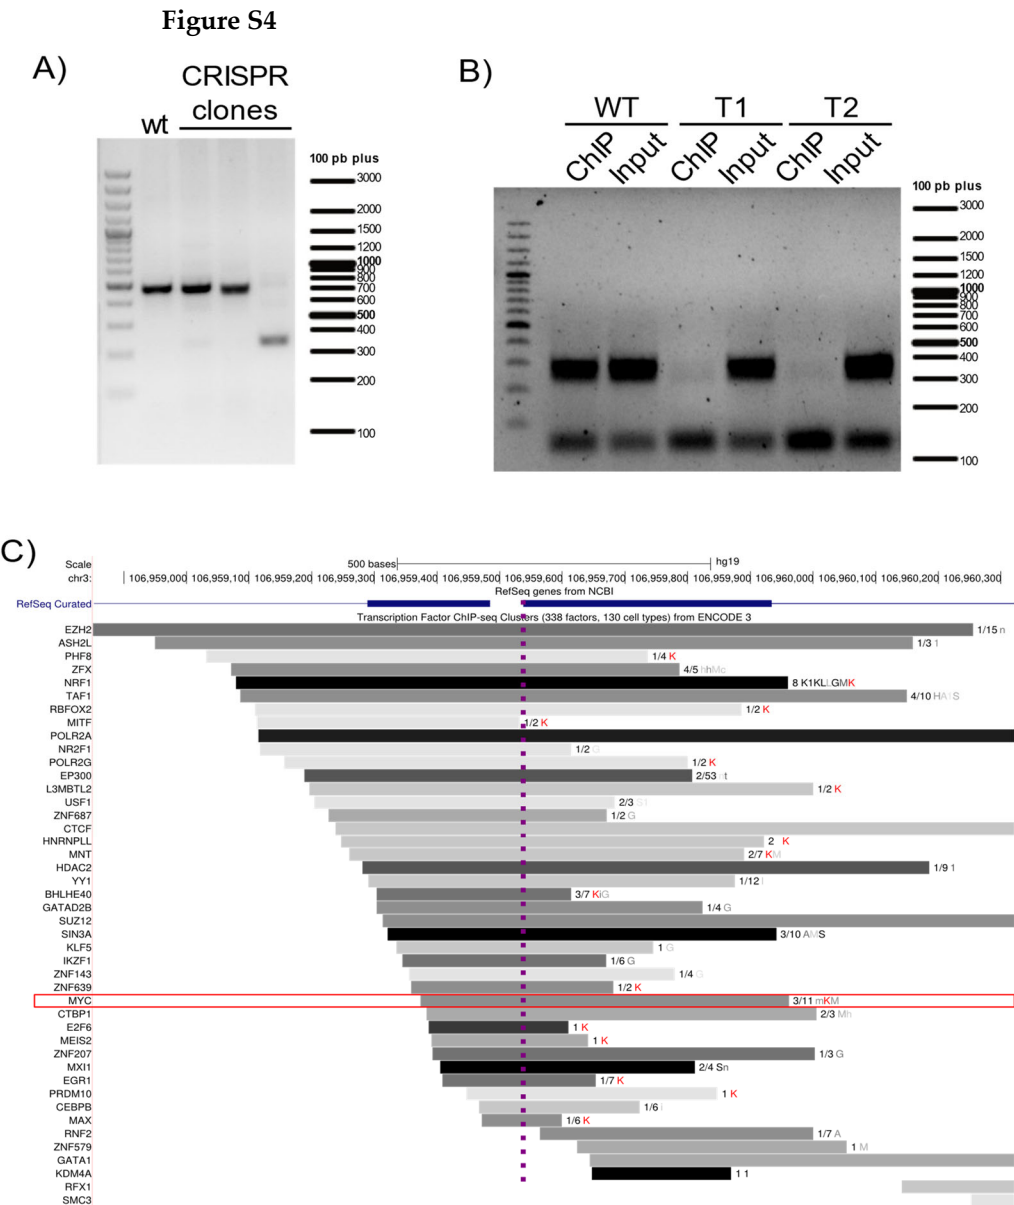

**Figure 4S.** CRISPR-Cas9 elimination of DUBR canonical TSS region. a) PCR genotyping for CRISPR-Cas9 assay targeting DUBR TSS region. b) ChIP PCR for c-Myc on DUBR TSS mutant clones. c) ENCODE 3 Transcription binding sites measured by ChIP-Seq, red “K” indicates a peak or more in K562 cell line, dashed purple line overlaps DUBR TSS, (retrieved from UCSC Genome Browser website).

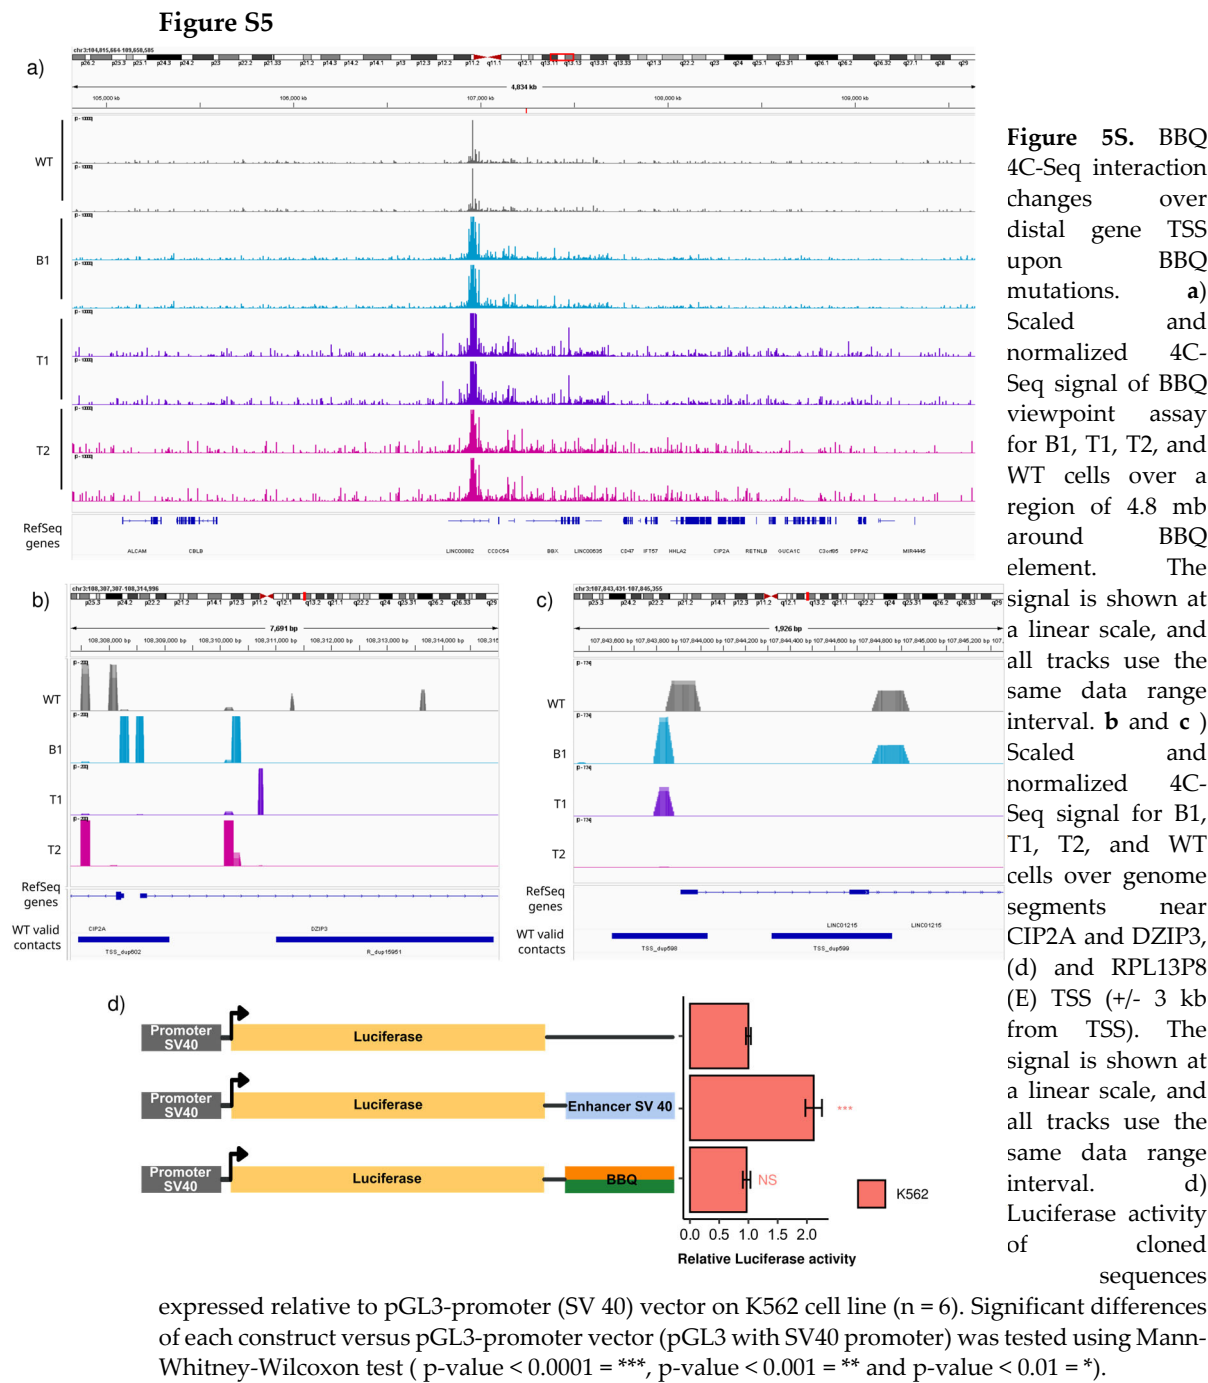

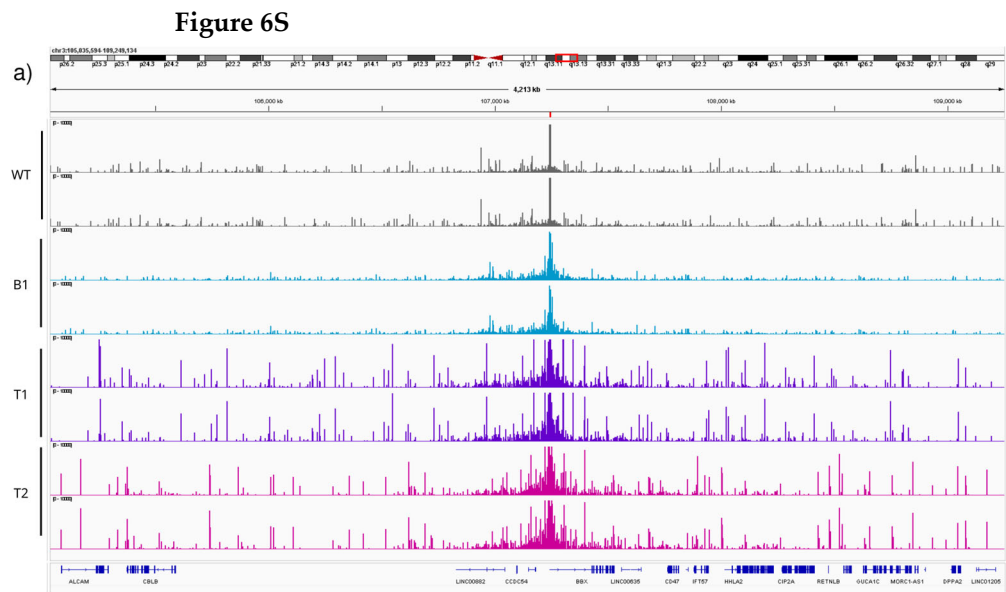

**Figure 6S.** BBX 4C-Seq general overview. **a)** Scaled and normalized 4C-Seq signal of BBX viewpoint assay for B1, T1, T2, and WT cells over a region of 4.2 mb around BBX element. The signal is shown at a linear scale, and all tracks use the same data range interval.
